# Supplementary material for: An Evaluation of Dried Blood Spots and Oral Swabs as Alternative Specimens for the Diagnosis of Dengue and Screening for Past Dengue Virus Exposure
Source: PubMed Central journal article supplement (PMC3391044; doi:10.4269/ajtmh.2012.11-0713), 2012-07-01
Supplement: SD4.pdf [file SD4.pdf]

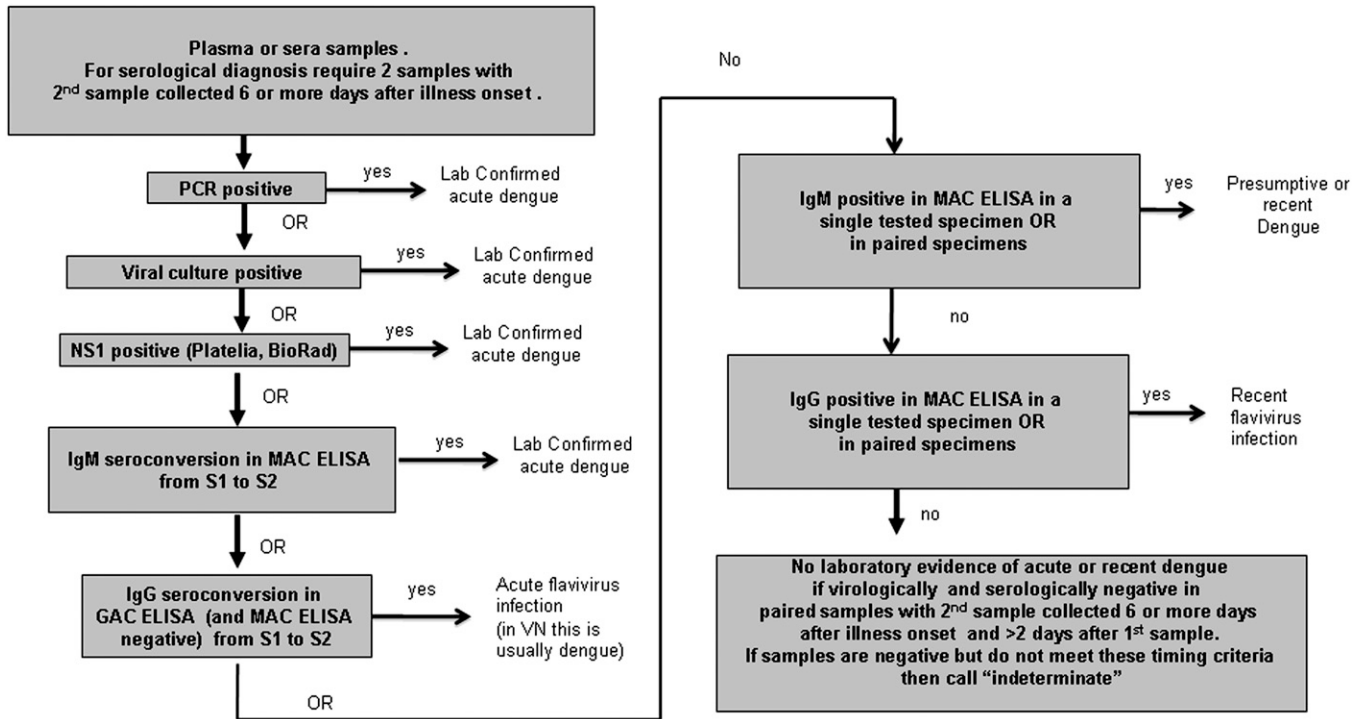

SUPPLEMENTAL APPENDIX. Dengue laboratory algorithm. In the presence of a clinical syndrome that might be dengue, the following definitions will apply. MAC = IgM capture ELISA; GAC = IgG capture ELISA.
